# Supplementary material
Source: MDPI journal article supplement (https://www.mdpi.com/2073-4433/11/9/999)
Supplement: s1 [file s1]

# Spatial variation and trend of extreme precipitation in West Africa and teleconnections with remote indices.

Samo DIATTA<sup>\*1,2</sup>, Cheikh Waly DIEDHIOU<sup>1</sup>, Didier DIONE<sup>2</sup>, Soussou SAMBOU<sup>2</sup>

<sup>1</sup> Laboratory for Oceanography, Environmental Science and Climate, Assane Seck University of Ziguinchor, Ziguinchor, Senegal; C.DIEDHIOU2227@zig.univ.sn

<sup>2</sup> Laboratoty of Atmospheric Physics —Simeon Fongang, Polytechnics School of Dakar, UCAD, Dakar, Senegal

<sup>3</sup> Laboratory of Hydraulics and Fluids Mechanics, Faculty of Science and Technology, University Cheikh Anta Diop, Dakar, Senegal; didiermaria.ndione@ucad.edu.sn (D.M.D.); soussou.sambou@ucad.edu.sn (S.S.)

\* Correspondence: [samo.diatta@univ-zig.sn](mailto:samo.diatta@univ-zig.sn)

## Supplementary Materials

Table 1.S.

| Indices                                  | Link                                                                                                                                                                                                                                                                      |
|------------------------------------------|---------------------------------------------------------------------------------------------------------------------------------------------------------------------------------------------------------------------------------------------------------------------------|
| North Atlantic Oscillation (NAO)         | <a href="https://www.cpc.ncep.noaa.gov/products/precip/CWlink/pna/norm.nao.monthly.b5001.current.ascii.table">https://www.cpc.ncep.noaa.gov/products/precip/CWlink/pna/norm.nao.monthly.b5001.current.ascii.table</a>                                                     |
| Madden Julian Oscillation phase 8 (MJO8) | <a href="https://climexp.knmi.nl/dat2nc.cgi?datafile=data/icpc_mjo08_mean12.dat&amp;type=i&amp;station=MJO_08&amp;id=someone@somewhere">https://climexp.knmi.nl/dat2nc.cgi?datafile=data/icpc_mjo08_mean12.dat&amp;type=i&amp;station=MJO_08&amp;id=someone@somewhere</a> |
| Atlantic Multidecadal Oscillation (AMO)  | <a href="http://www.esrl.noaa.gov/psd/data/timeseries/AMO/">http://www.esrl.noaa.gov/psd/data/timeseries/AMO/</a>                                                                                                                                                         |
| Atlantic Multidecadal Mode (AMM)         | <a href="http://www.esrl.noaa.gov/psd/data/timeseries/monthly/AMM/">http://www.esrl.noaa.gov/psd/data/timeseries/monthly/AMM/</a>                                                                                                                                         |

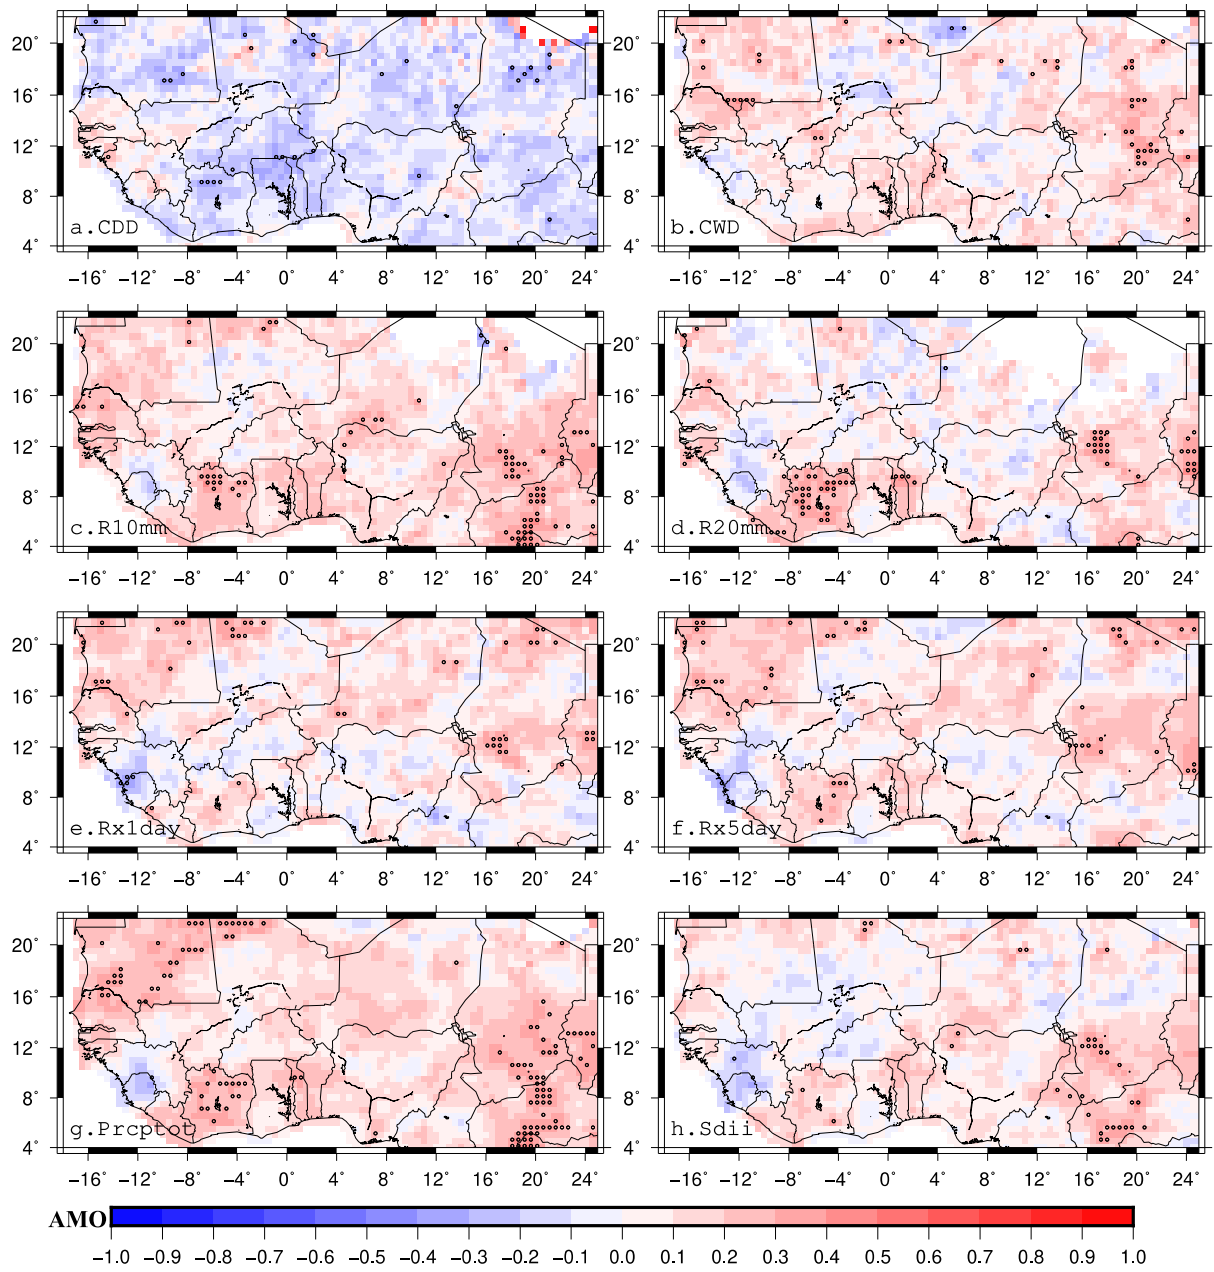

**Figure S1:** Correlation patterns between AMO and extreme precipitation indices. Tipping points represent significant correlation areas using reduced degree of freedom.

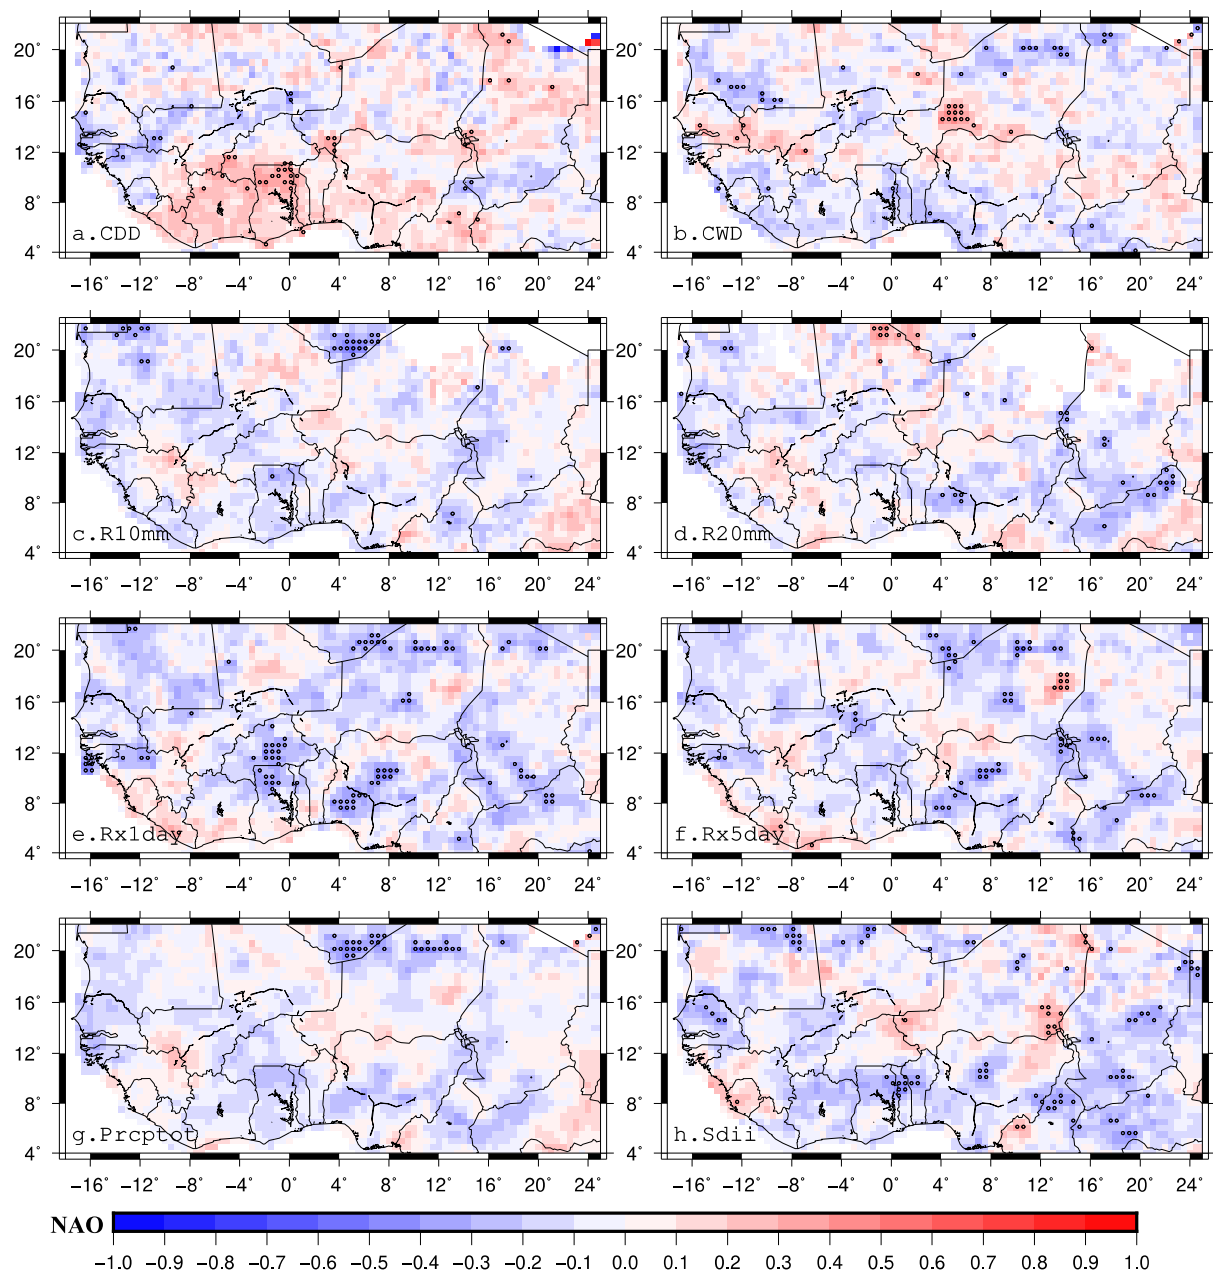

Figure S2: as for figure S1 but for NAO

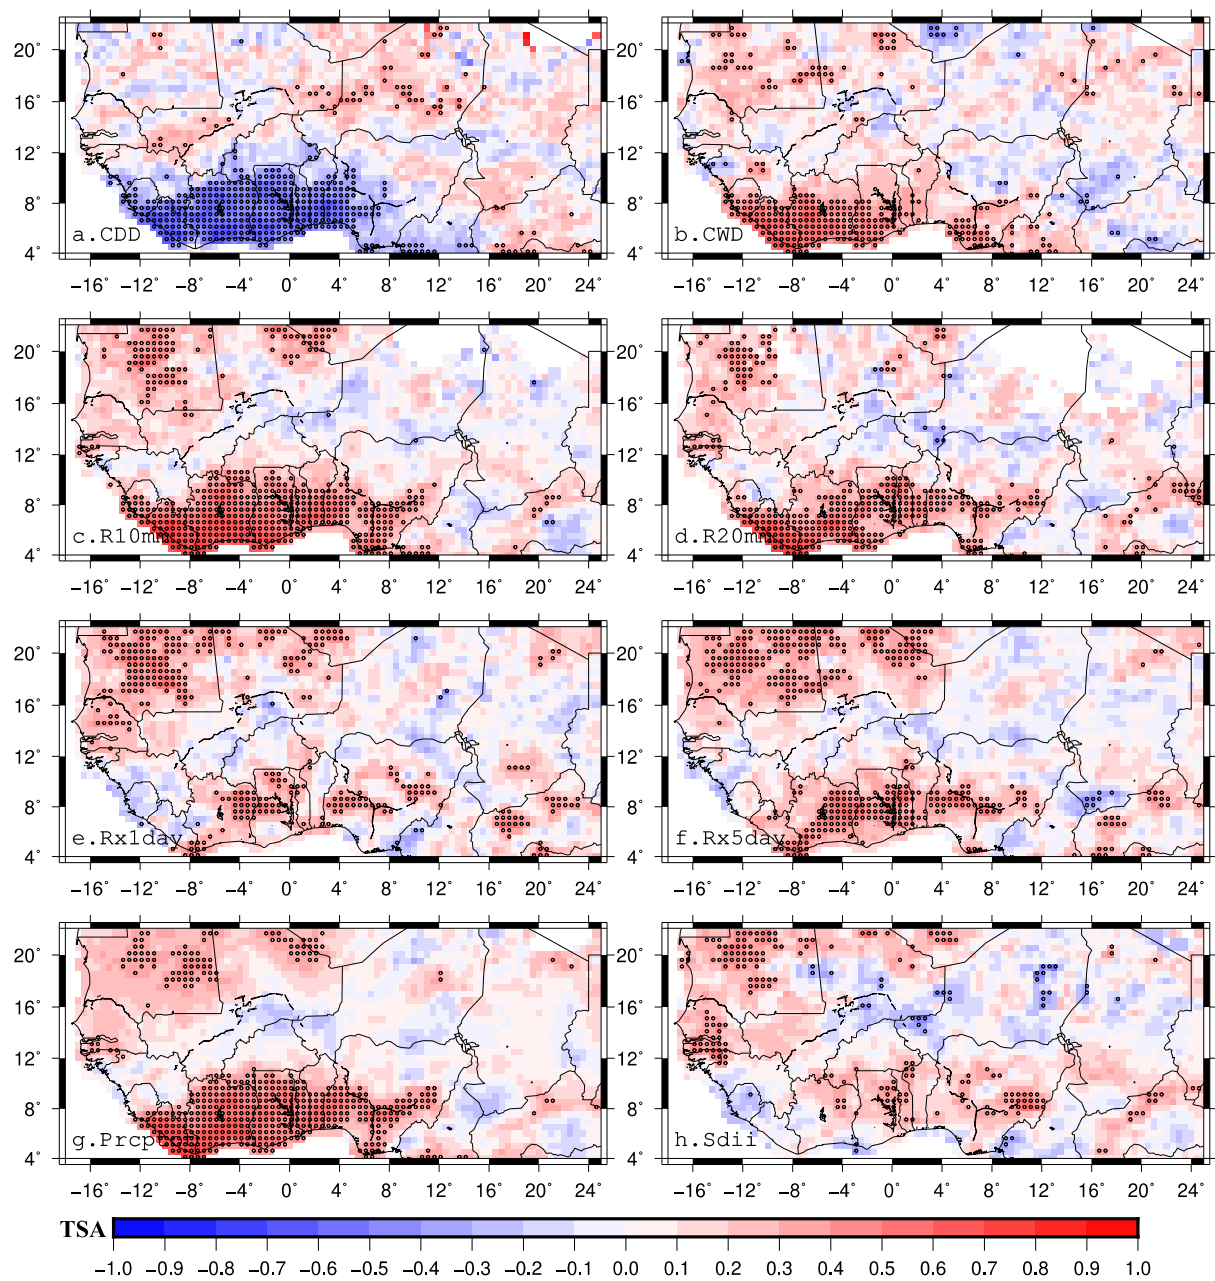

Figure S3: as for figure S1 but for TSA

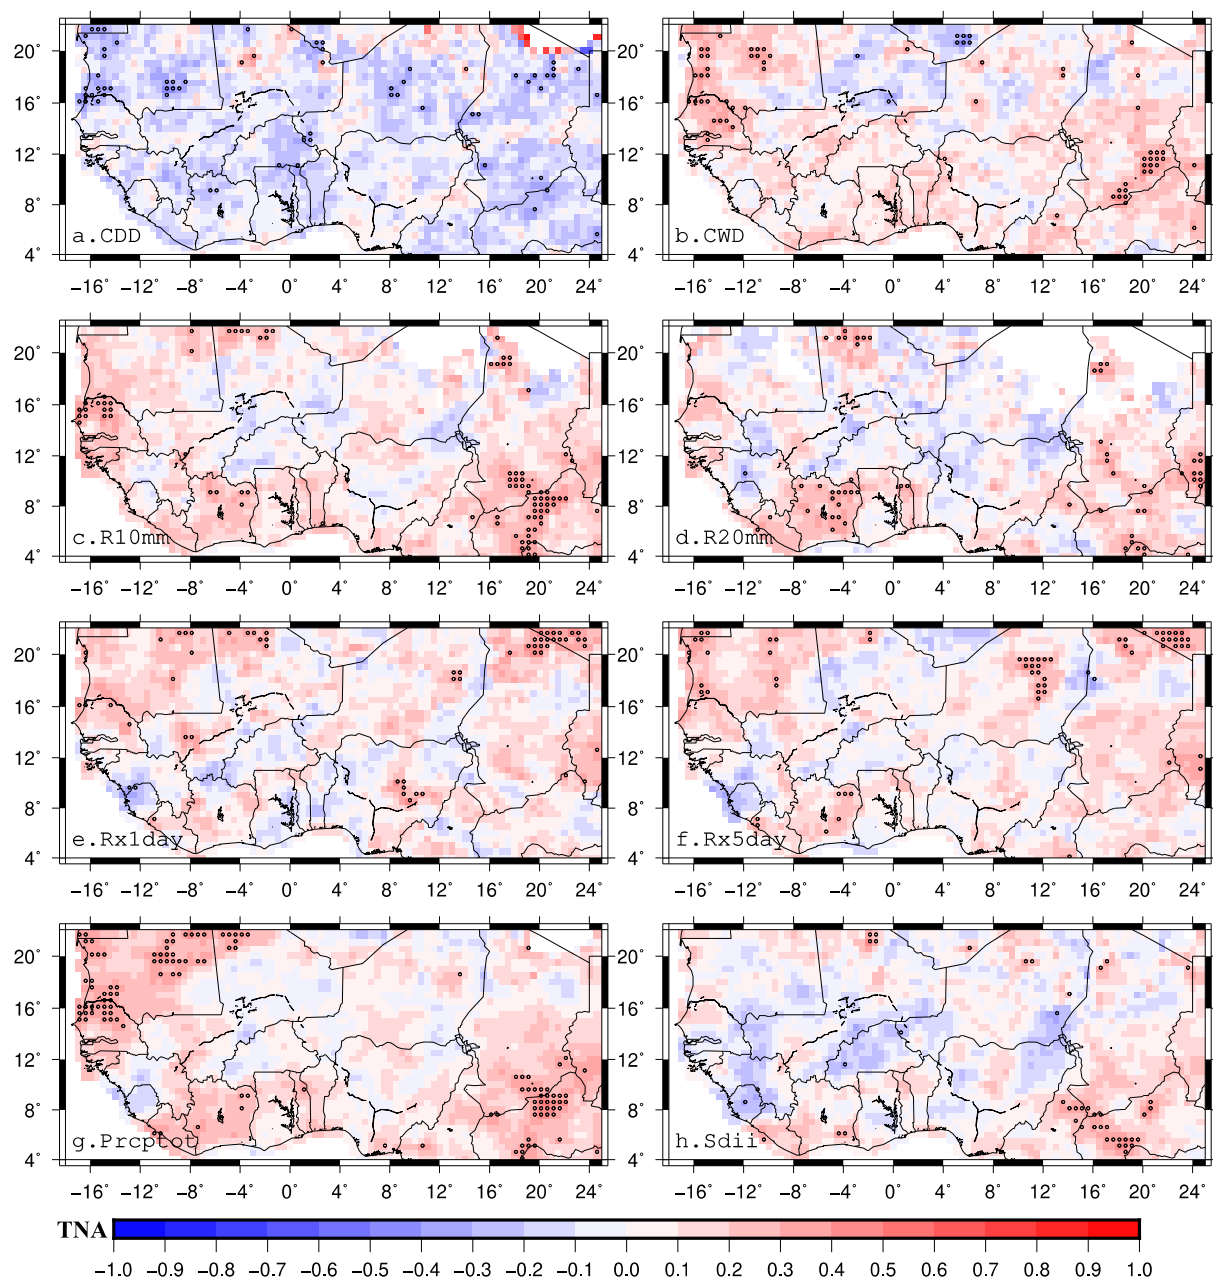

Figure S4: as for figure S1 but for TNA

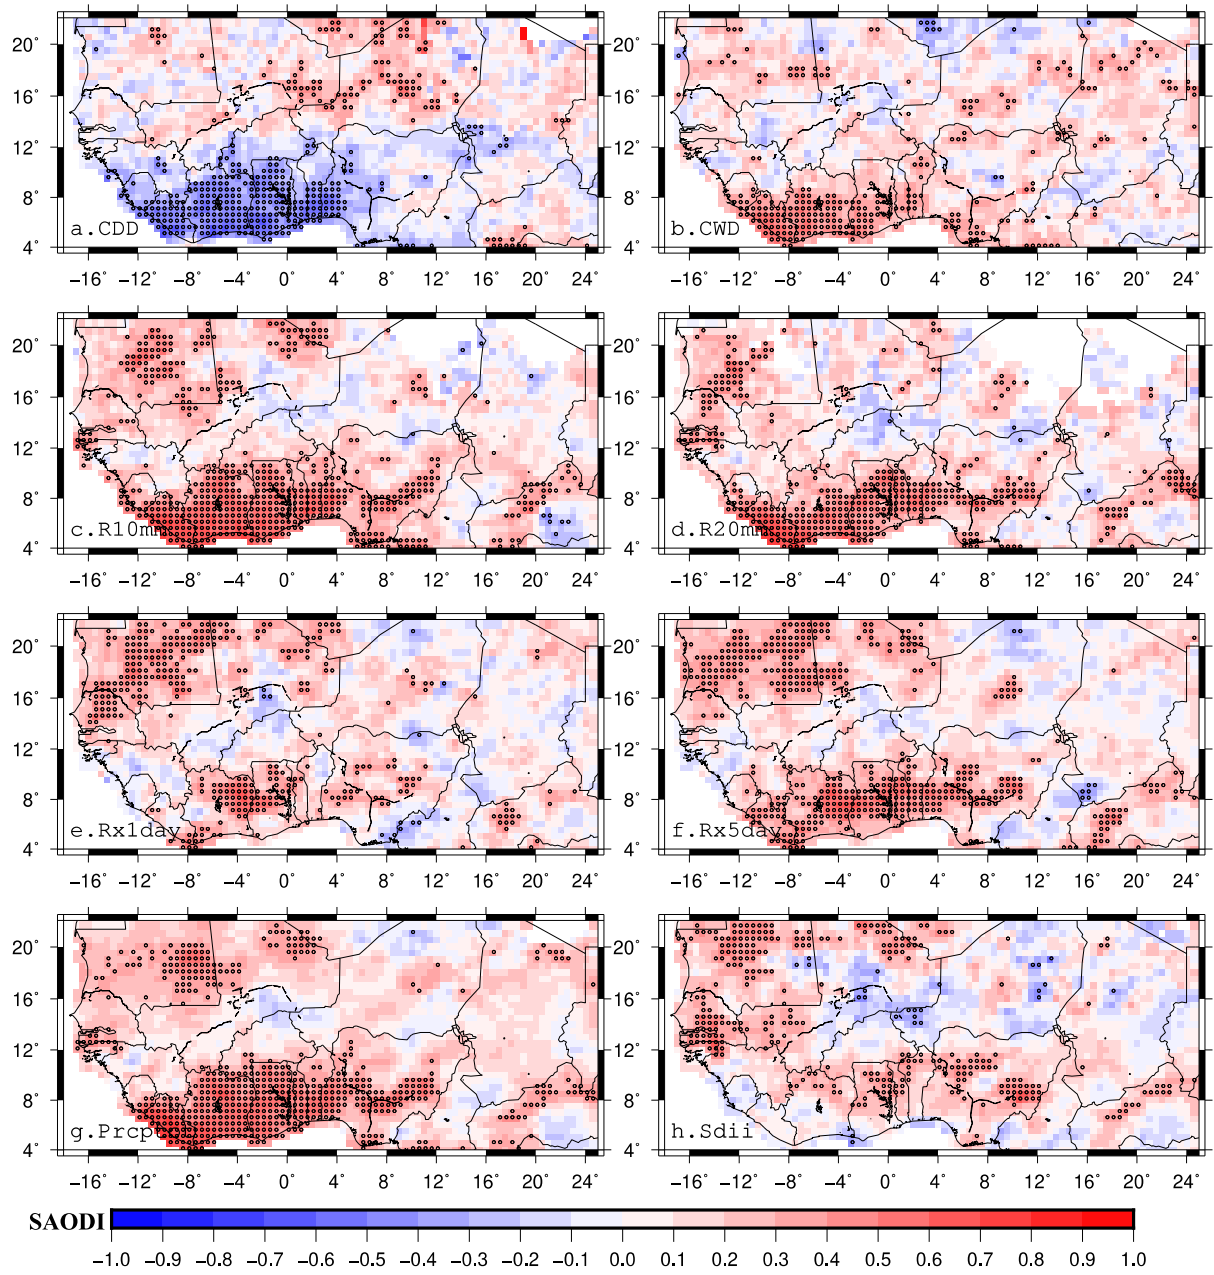

Figure S5: as for figure S1 but for SAODI.
